# Supplementary material for: Hesperidin as a Species-Specific Modifier of Aphid Behavior
Source: MDPI journal article supplement (doi:10.3390/ijms25094822), 2024-04-28
Supplement: s1 [file s1]

**Table S1.** Probing behavior of *Acyrtosiphon pisum* on *Pisum sativum* treated with ethanolic solutions of hesperidin: non-sequential EPG parameters (min-max and median values).

| EPG variable                                               | Hesperidin 0.0 % |              |        | Hesperidin 0.1 % |              |        | Hesperidin 0.5 % |              |        |
|------------------------------------------------------------|------------------|--------------|--------|------------------|--------------|--------|------------------|--------------|--------|
|                                                            | n <sup>1</sup>   | Min-Max      | Median | n <sup>1</sup>   | Min-Max      | Median | n <sup>1</sup>   | Min-Max      | Median |
| <b>No probing</b>                                          |                  |              |        |                  |              |        |                  |              |        |
| Total duration of np                                       | 22               | 130.1-3619   | 1012   | 14               | 105.5-10686  | 2078   | 14               | 204.6-19108  | 1981   |
| Number of np                                               | 22               | 2-38         | 14.5   | 14               | 5-57         | 15.5   | 14               | 7-46         | 15.5   |
| Mean duration of np                                        | 22               | 37.52-185    | 74.4   | 14               | 15.07-1069   | 97.05  | 14               | 29.23-1911   | 114.3  |
| <b>Probing</b>                                             |                  |              |        |                  |              |        |                  |              |        |
| Total probing time                                         | 22               | 25181-28670  | 27788  | 14               | 18114-28695  | 26722  | 14               | 9692-28595   | 26819  |
| Number of probes                                           | 22               | 2-38         | 14.5   | 14               | 5-57         | 15.5   | 14               | 7-46         | 15.5   |
| Number of short probes (C<3 minutes)                       | 22               | 0-25         | 7      | 14               | 2-39         | 7      | 14               | 1-31         | 6.5    |
| <b>Pathway phase</b>                                       |                  |              |        |                  |              |        |                  |              |        |
| Total duration of C                                        | 22               | 2271-19449   | 10666  | 14               | 4176-27334   | 13853  | 14               | 3545-24719   | 13573  |
| Number of C                                                | 22               | 4-44         | 16.5   | 14               | 6-59         | 19     | 14               | 9-48         | 20     |
| Mean duration of C                                         | 22               | 141.9-978    | 594.2  | 14               | 208.8-2485   | 683.6  | 14               | 348.4-1274   | 639    |
| <b>Derailed stylet activities</b>                          |                  |              |        |                  |              |        |                  |              |        |
| Total duration of F                                        | 22               | 0-0          | 0      | 14               | 0-0          | 0      | 14               | 0-0          | 0      |
| Number of F                                                | 22               | 0-0          | 0      | 14               | 0-0          | 0      | 14               | 0-0          | 0      |
| Mean duration of F <sup>2</sup>                            | 22               | 0-0          | 0      | 14               | 0-0          | 0      | 14               | 0-0          | 0      |
| <b>Xylem phase</b>                                         |                  |              |        |                  |              |        |                  |              |        |
| Total duration of G                                        | 22               | 0-0          | 0      | 14               | 0-12300      | 0      | 14               | 0-23655      | 0      |
| Number of G                                                | 22               | 0-0          | 0      | 14               | 0-2          | 0      | 14               | 0-5          | 0      |
| Mean duration of G <sup>2</sup>                            | 22               | 0-0          | 0      | 6                | 1040-6150    | 3763   | 2                | 3526-11827   | 7677   |
| <b>Phloem phase: general</b>                               |                  |              |        |                  |              |        |                  |              |        |
| Total duration of phloem phase E (E1+E2)                   | 22               | 7287-25629   | 16982  | 14               | 0-22925      | 9249   | 14               | 0-16754      | 7235   |
| Total duration of E1                                       | 22               | 42.79-1924   | 291.7  | 14               | 0-1724       | 258.7  | 14               | 0-2395       | 485.1  |
| Total duration of E2                                       | 22               | 6567-25586   | 15878  | 14               | 0-22624      | 8920   | 14               | 0-16641      | 5909   |
| <b>Phloem phase: salivation (E1)</b>                       |                  |              |        |                  |              |        |                  |              |        |
| Number of E1                                               | 22               | 1-27         | 7.5    | 14               | 0-28         | 4.5    | 14               | 0-14         | 6      |
| Mean duration of E1 <sup>2</sup>                           | 22               | 26.894-245.3 | 55.58  | 12               | 0-246.2      | 47.9   | 12               | 0-180.9      | 74.29  |
| Number of single E1 <sup>2</sup>                           | 22               | 0-2          | 0      | 12               | 0-1          | 0      | 12               | 0-1          | 0      |
| Total duration of E1 followed by E2 <sup>2</sup>           | 22               | 42.79-1129.2 | 277.7  | 12               | 116.8-748    | 265.8  | 12               | 62.72-1069.5 | 358.6  |
| Total duration of E1 followed by E2 >10 min <sup>2</sup>   | 22               | 42.79-519.2  | 171.4  | 12               | 58.6-637.8   | 216.1  | 12               | 62.72-572.6  | 175.2  |
| Duration of the E1 followed by 1st E2 <sup>2</sup>         | 22               | 23.12-418.8  | 41.42  | 12               | 37.85-394.4  | 73.45  | 12               | 36.92-280.9  | 66.18  |
| Duration of the E1 followed by 1st E2 >10 min <sup>2</sup> | 22               | 23.12-418.8  | 42.69  | 12               | 37.85-394.4  | 70.66  | 12               | 36.92-303.7  | 85.75  |
| Contribution of E1 to phloem phase (%) <sup>2</sup>        | 22               | 0.167-11.15  | 2.843  | 14               | 0.7121-19.19 | 4.589  | 14               | 0.6694-30.55 | 5.007  |
| <b>Phloem phase: sap ingestion (E2)</b>                    |                  |              |        |                  |              |        |                  |              |        |
| Number of E2                                               | 22               | 1-21         | 6.5    | 14               | 0-26         | 4      | 14               | 0-8          | 4.5    |
| Number of E2 >10 min                                       | 22               | 1-8          | 3      | 14               | 0-7          | 3.5    | 14               | 0-8          | 2      |
| Mean duration of E2 <sup>2</sup>                           | 22               | 730.2-25586  | 1916   | 12               | 0-5656       | 1296   | 12               | 0-8321       | 1290   |
| Duration of the longest E2 <sup>2</sup>                    | 22               | 1374-25586   | 7108   | 12               | 1383-10131   | 3548   | 12               | 1885-11158   | 3536   |

<sup>1</sup> number of replications; <sup>2</sup> only the EPG recordings that included a particular waveform were included in calculations; np – no probing (aphid stylets outside the plant tissues); C – pathway activity (extracellular stylet penetration with potential drops, i.e., short cell punctures); F – derailed stylet activities (difficulties in penetration); G – xylem phase (ingestion of xylem sap); E – phloem phase including E1 (phloem salivation) and E2 (phloem sap ingestion); E2 > 10 min. – sustained ingestion of phloem sap.

**Table S2.** Probing behavior of *Acyrtosiphon pisum* on *Pisum sativum* treated with ethanolic solutions of hesperidin: sequential EPG parameters (min-max and median values).

| EPG variables                                                          | Hesperidin 0.0 % |             |        | Hesperidin 0.1 % |              |        | Hesperidin 0.5 % |             |        |
|------------------------------------------------------------------------|------------------|-------------|--------|------------------|--------------|--------|------------------|-------------|--------|
|                                                                        | n <sup>1</sup>   | Min-Max     | Median | n <sup>1</sup>   | Min-Max      | Median | n <sup>1</sup>   | Min-Max     | Median |
| <b>Start of EPG</b>                                                    |                  |             |        |                  |              |        |                  |             |        |
| Time to 1st probe from start of EPG                                    | 22               | 0.39-448.1  | 48.9   | 14               | 2.59-181     | 19.73  | 14               | 0.53-1258.6 | 51.73  |
| Duration of 1st probe                                                  | 22               | 3.87-13377  | 112.09 | 14               | 3.39-1591    | 17.61  | 14               | 11.08-6213  | 75.05  |
| Duration of the second nonprobe period                                 | 22               | 17.43-196.3 | 42.28  | 14               | 10.48-1455.6 | 35.08  | 14               | 9.69-206.3  | 51.67  |
| Duration of 2nd probe                                                  | 22               | 9.56-15293  | 539.7  | 14               | 2.89-7238    | 24.4   | 14               | 7.6-20044   | 104.2  |
| <b>Before 1<sup>st</sup> phloem phase</b>                              |                  |             |        |                  |              |        |                  |             |        |
| Time from start of EPG to 1st E <sup>2</sup>                           | 22               | 676-11760   | 2786   | 14               | 1865-28800   | 7190   | 14               | 782-28800   | 5079   |
| Time from 1st probe to 1st E <sup>3</sup>                              | 22               | 622-11604   | 2776   | 14               | 1859-28770   | 7172   | 14               | 735-28799   | 5034   |
| Time from the beginning of that probe to 1st E <sup>4</sup>            | 22               | 578.7-1887  | 1334   | 12               | 343.9-2454   | 1341   | 12               | 533.4-4536  | 1270   |
| Number of probes to the 1st E1                                         | 22               | 1-16        | 4.5    | 12               | 2-23         | 8.5    | 12               | 1-30        | 4      |
| Duration of nonprobe period before the 1st E                           | 22               | 0.58-2673   | 192    | 14               | 51.62-10686  | 1163.1 | 14               | 11.17-3813  | 473.4  |
| Duration of the shortest C wave before E1                              | 22               | 453.5-1555  | 1021   | 12               | 343.9-2043   | 1283   | 12               | 533.4-2021  | 1268   |
| <b>1<sup>st</sup> phloem phase</b>                                     |                  |             |        |                  |              |        |                  |             |        |
| Duration of 1 <sup>st</sup> phloem phase E                             | 22               | 211.5-25629 | 2838   | 12               | 162.8-9792   | 1778   | 12               | 49.4-3472   | 1423   |
| <b>Before 1<sup>st</sup> sap ingestion phase E2</b>                    |                  |             |        |                  |              |        |                  |             |        |
| Time from start of EPG to 1st E2 <sup>5</sup>                          | 22               | 1450-12178  | 2839   | 14               | 1925-28800   | 7246   | 14               | 1038-28800  | 5396   |
| Time from 1st probe to 1st E2 <sup>6</sup>                             | 22               | 668-12023   | 2819   | 14               | 1919-28770   | 7228   | 14               | 1016-28799  | 5114   |
| Time from the beginning of that probe to 1st E2 <sup>7</sup>           | 22               | 669-2419    | 1396   | 12               | 411.4-2492   | 1491   | 12               | 667.5-4573  | 1817   |
| <b>Before 1<sup>st</sup> sap ingestion phase E2&gt;10 min</b>          |                  |             |        |                  |              |        |                  |             |        |
| Time to from start of EPG 1st E2> 10 min <sup>8</sup>                  | 22               | 1450-12178  | 2839   | 14               | 1925-28800   | 7246   | 14               | 1038-28800  | 5396   |
| Time from 1st probe to 1st E2>10 min <sup>9</sup>                      | 22               | 1208-12023  | 2819   | 14               | 1919-28770   | 7228   | 14               | 1016-28799  | 5324   |
| Time from the beginning of that probe to 1st E2> 10 min. <sup>10</sup> | 22               | 669-2419    | 1396   | 12               | 411.4-2492   | 1491   | 12               | 667.5-4573  | 1817   |
| <b>After 1<sup>st</sup> phloem phase</b>                               |                  |             |        |                  |              |        |                  |             |        |
| Number of probes after 1st E                                           | 22               | 0-33        | 7      | 12               | 0-35         | 6.5    | 12               | 0-36        | 10     |
| Number of probes shorter than 3 minutes after 1st E                    | 22               | 0-21        | 3      | 12               | 0-26         | 2.5    | 12               | 0-18        | 3.5    |
| Potential E2 index                                                     | 22               | 24.916-100  | 62.06  | 12               | 0-99.86      | 49.69  | 12               | 0-65.25     | 29.43  |

<sup>1</sup> number of replications; <sup>2</sup> total duration of of EPG recording if E is missing; <sup>3</sup> time from 1<sup>st</sup> probe to the end of EPG recording if E is missing; <sup>4</sup> missing data if E is missing; E2; <sup>5</sup> total duration of of EPG recording if E is missing; <sup>6</sup> time from 1<sup>st</sup> probe to the end of EPG recording if E is missing; <sup>7</sup> missing data if E is missing; <sup>8</sup> total duration of of EPG recording if E is missing; <sup>9</sup> time from 1<sup>st</sup> probe to the end of EPG recording if E is missing; <sup>10</sup> missing data if E is missing.

**Table S3.** Probing behavior of *Rhopalosiphum padi* on *Avena sativa* treated with ethanolic solutions of hesperidin: non-sequential EPG parameters (min-max and median values).

| EPG variable                                               | Hesperidin 0.0 % |              |        | Hesperidin 0.1 % |             |        | Hesperidin 0.5 % |              |        |
|------------------------------------------------------------|------------------|--------------|--------|------------------|-------------|--------|------------------|--------------|--------|
|                                                            | n <sup>1</sup>   | Min-Max      | Median | n <sup>1</sup>   | Min-Max     | Median | n <sup>1</sup>   | Min-Max      | Median |
| <b>No probing</b>                                          |                  |              |        |                  |             |        |                  |              |        |
| Total duration of np                                       | 15               | 270.7-5108   | 2207   | 15               | 674.3-17360 | 4985   | 12               | 406-12287    | 1392   |
| Number of np                                               |                  |              |        |                  |             |        |                  |              |        |
| Mean duration of np                                        | 15               | 30.08-378    | 246.9  | 15               | 74.46-3472  | 308.5  | 12               | 78.27-2694   | 244.6  |
| <b>Probing</b>                                             |                  |              |        |                  |             |        |                  |              |        |
| Total probing time                                         | 15               | 23691-28529  | 26593  | 15               | 11440-28125 | 23815  | 12               | 16513-28394  | 27408  |
| Number of probes                                           | 15               | 3-19         | 7      | 15               | 4-22        | 10     | 12               | 1-17         | 5      |
| Number of short probes (C<3 minutes)                       | 15               | 0-9          | 2      | 15               | 0-9         | 2      | 12               | 0-8          | 1      |
| <b>Pathway phase</b>                                       |                  |              |        |                  |             |        |                  |              |        |
| Total duration of C                                        | 15               | 1101-12904   | 7172   | 15               | 3009-12759  | 8103   | 12               | 1532-13887   | 5568   |
| Number of C                                                | 15               | 4-32         | 12     | 15               | 7-29        | 18     | 12               | 2-32         | 14     |
| Mean duration of C                                         | 15               | 213.8-806.5  | 404.7  | 15               | 289.4-750.5 | 448.4  | 12               | 229.7-921.8  | 492.7  |
| <b>Derailed stylet activities</b>                          |                  |              |        |                  |             |        |                  |              |        |
| Total duration of F                                        | 15               | 0-11941      | 3738   | 15               | 0-15032     | 2217   | 12               | 0-10652      | 716    |
| Number of F                                                | 15               | 0-5          | 2      | 15               | 0-7         | 2      | 12               | 0-5          | 1      |
| Mean duration of F <sup>2</sup>                            | 12               | 617.4-5970   | 2180   | 12               | 0-3487      | 2174   | 7                | 602.8-5641   | 1346   |
| <b>Xylem phase</b>                                         |                  |              |        |                  |             |        |                  |              |        |
| Total duration of G                                        | 15               | 0-11154      | 0      | 15               | 0-10154     | 4649   | 12               | 0-24573      | 5557   |
| Number of G                                                | 15               | 0-3          | 0      | 15               | 0-4         | 2      | 12               | 0-8          | 2.5    |
| Mean duration of G <sup>2</sup>                            | 4                | 1195-5577    | 1670   | 12               | 892-10049   | 2701   | 9                | 1315-8191    | 2467   |
| <b>Phloem phase: general</b>                               |                  |              |        |                  |             |        |                  |              |        |
| Total duration of phloem phase E (E1+E2)                   | 15               | 173.63-25309 | 16131  | 15               | 0-19658     | 2025   | 12               | 0-26550      | 6008   |
| Total duration of E1                                       | 15               | 26.08-591    | 175.1  | 15               | 0-1022      | 79.3   | 12               | 0-2574       | 152.6  |
| Total duration of E2                                       | 15               | 37.12-25263  | 16102  | 15               | 0-19609     | 1722   | 12               | 0-26497      | 5682   |
| <b>Phloem phase: salivation (E1)</b>                       |                  |              |        |                  |             |        |                  |              |        |
| Number of E1                                               | 15               | 1-10         | 4      | 15               | 0-8         | 2      | 12               | 0-11         | 3.5    |
| Mean duration of E1 <sup>2</sup>                           | 15               | 22.8-136     | 37.63  | 12               | 23.66-127.7 | 37.93  | 10               | 23.4-514.8   | 40.2   |
| Number of single E1 <sup>2</sup>                           | 15               | 0-3          | 0      | 15               | 0-2         | 0      | 12               | 0-6          | 0.5    |
| Total duration of E1 followed by E2 <sup>2</sup>           | 15               | 26.08-544    | 175.1  | 12               | 23.69-368.8 | 133.4  | 10               | 30.29-1207.3 | 152.8  |
| Total duration of E1 followed by E2 >10 min <sup>2</sup>   | 14               | 24.52-513.6  | 58.31  | 9                | 28.88-128.7 | 56.9   | 8                | 30.29-212.9  | 54.57  |
| Duration of the E1 followed by 1st E2 <sup>2</sup>         | 15               | 20.08-151.4  | 33.39  | 12               | 23.69-56    | 30.31  | 10               | 21.83-116.9  | 31.79  |
| Duration of the E1 followed by 1st E2 >10 min <sup>2</sup> | 14               | 24.52-88.07  | 37.89  | 9                | 28.88-68.94 | 42.58  | 8                | 26.81-56.21  | 31.44  |
| Contribution of E1 to phloem phase (%) <sup>2</sup>        | 15               | 0.106-78.62  | 1.24   | 12               | 0.246-58.39 | 5.141  | 10               | 0.1478-72.5  | 4.167  |
| <b>Phloem phase: sap ingestion (E2)</b>                    |                  |              |        |                  |             |        |                  |              |        |
| Number of E2                                               | 15               | 1-7          | 3      | 15               | 0-7         | 2      | 12               | 0-10         | 2.5    |
| Number of E2 >10 min                                       | 15               | 0-4          | 1      | 15               | 0-3         | 1      | 12               | 0-3          | 1      |
| Mean duration of E2 <sup>2</sup>                           | 15               | 37.12-24570  | 3512   | 12               | 16.87-19609 | 1996   | 10               | 91.44-20461  | 1436   |
| Duration of the longest E2 <sup>2</sup>                    | 15               | 37.12-25225  | 11388  | 12               | 23.9-19609  | 3383   | 10               | 149.01-20461 | 5990   |

<sup>1</sup> number of replications; <sup>2</sup> only the EPG recordings that included a particular waveform were included in calculations; np – no probing (aphid stylets outside the plant tissues); C – pathway activity (extracellular stylet penetration with potential drops, i.e., short cell punctures); F – derailed stylet activities (difficulties in penetration); G – xylem phase (ingestion of xylem sap); E – phloem phase including E1 (phloem salivation) and E2 (phloem sap ingestion); E2 > 10 min. – sustained ingestion of phloem sap.

**Table S4.** Probing behavior of *Rhopalosiphum padi* on *Avena sativa* treated with ethanolic solutions of hesperidin: sequential EPG parameters (min-max and median values).

| EPG variable                                                           | Hesperidin 0.0 % |              |        | Hesperidin 0.1 % |             |        | Hesperidin 0.5 % |             |        |
|------------------------------------------------------------------------|------------------|--------------|--------|------------------|-------------|--------|------------------|-------------|--------|
|                                                                        | n <sup>1</sup>   | Min-Max      | Median | n <sup>1</sup>   | Min-Max     | Median | n <sup>1</sup>   | Min-Max     | Median |
| <b>Start of EPG</b>                                                    |                  |              |        |                  |             |        |                  |             |        |
| Time to 1st probe from start of EPG                                    | 15               | 0.96-1166    | 130.2  | 15               | 0.16-1319   | 47.1   | 12               | 15.98-2694  | 213.6  |
| Duration of 1st probe                                                  | 15               | 9.63-26288   | 3768   | 15               | 10.19-14289 | 4441   | 12               | 42.7-28394  | 676    |
| Duration of the second nonprobe period                                 | 15               | 13.72-1505.7 | 131.91 | 15               | 5.16-490.1  | 115.25 | 12               | 9.63-466.9  | 42.7   |
| Duration of 2nd probe                                                  | 15               | 11.26-19773  | 493.8  | 15               | 14.74-7398  | 553.8  | 12               | 16.63-6083  | 579.5  |
| <b>Before 1<sup>st</sup> phloem phase</b>                              |                  |              |        |                  |             |        |                  |             |        |
| Time from start of EPG to 1st E <sup>2</sup>                           | 15               | 957.2-14900  | 5886   | 15               | 853.9-28800 | 6747   | 12               | 731.3-28800 | 8043   |
| Time from 1st probe to 1st E <sup>3</sup>                              | 15               | 956.2-14884  | 5544   | 15               | 711.2-28800 | 6709   | 12               | 626.8-28554 | 7667   |
| Time from the beginning of that probe to 1st E <sup>4</sup>            | 15               | 424.8-11528  | 956    | 12               | 501.5-7360  | 2931   | 10               | 448.1-11400 | 1280   |
| Number of probes to the 1st E1                                         | 15               | 1-8          | 3      | 12               | 1-11        | 1      | 10               | 1-9         | 3      |
| Duration of nonprobe period before the 1st E                           | 15               | 0.96-1538    | 660.5  | 15               | 0.83-8966   | 549.3  | 12               | 104.53-2694 | 542.3  |
| Duration of the shortest C wave before E1                              | 15               | 397.6-2525   | 729.1  | 12               | 468.9-7360  | 1218.4 | 10               | 288.5-1515  | 656.1  |
| <b>1<sup>st</sup> phloem phase</b>                                     |                  |              |        |                  |             |        |                  |             |        |
| Duration of 1 <sup>st</sup> phloem phase E                             | 15               | 14.33-25250  | 222.3  | 12               | 40.29-19658 | 168.2  | 10               | 37.12-20491 | 82.1   |
| <b>Before 1<sup>st</sup> sap ingestion phase E2</b>                    |                  |              |        |                  |             |        |                  |             |        |
| Time from start of EPG to 1st E2 <sup>5</sup>                          | 15               | 981.7-14938  | 5932   | 15               | 883.4-28800 | 6773   | 12               | 764.6-28800 | 9241   |
| Time from 1st probe to 1st E2 <sup>6</sup>                             | 15               | 980.7-14922  | 5590   | 15               | 740.8-28800 | 6736   | 12               | 660.1-28554 | 8865   |
| Time from the beginning of that probe to 1st E2 <sup>7</sup>           | 15               | 453.5-11992  | 1023   | 12               | 525.2-7389  | 2959   | 10               | 357.1-5995  | 701    |
| <b>Before 1<sup>st</sup> sap ingestion phase E2&gt;10 min</b>          |                  |              |        |                  |             |        |                  |             |        |
| Time to from start of EPG 1st E2> 10 min <sup>8</sup>                  | 15               | 982-28800    | 10041  | 15               | 883-28800   | 17618  | 12               | 1948-28800  | 16273  |
| Time from 1st probe to 1st E2>10 min <sup>9</sup>                      | 15               | 981-28784    | 9760   | 15               | 741-28800   | 17607  | 12               | 1542-28619  | 15951  |
| Time from the beginning of that probe to 1st E2> 10 min. <sup>10</sup> | 14               | 453.5-2760   | 974    | 9                | 740.8-7389  | 3385   | 8                | 357.1-8892  | 2348   |
| <b>After 1<sup>st</sup> phloem phase</b>                               |                  |              |        |                  |             |        |                  |             |        |
| Number of probes after 1st E                                           | 15               | 0-14         | 5      | 15               | 0-12        | 3      | 12               | 0-13        | 1.5    |
| Number of probes shorter than 3 minutes after 1st E                    | 15               | 0-6          | 1      | 15               | 0-4         | 0      | 12               | 0-4         | 0      |
| Potential E2 index                                                     | 15               | 0.26779-100  | 62.14  | 9                | 0-100       | 7.82   | 8                | 0-100       | 22.28  |

<sup>1</sup> number of replications; <sup>2</sup> total duration of of EPG recording if E is missing; <sup>3</sup> time from 1<sup>st</sup> probe to the end of EPG recording if E is missing; <sup>4</sup> missing data if E is missing; E2; <sup>5</sup> total duration of of EPG recording if E is missing; <sup>6</sup> time from 1<sup>st</sup> probe to the end of EPG recording if E is missing; <sup>7</sup> missing data if E is missing; <sup>8</sup> total duration of of EPG recording if E is missing; <sup>9</sup> time from 1<sup>st</sup> probe to the end of EPG recording if E is missing; <sup>10</sup> missing data if E is missing.

**Table S5.** Probing behavior of *Myzus persicae* on *Brassica rapa* subsp. *pekinensis* treated with ethanolic solutions of hesperidin: non-sequential EPG parameters (min-max and median values).

| EPG variable                                               | Hesperidin 0.0 % |             |        | Hesperidin 0.1 % |              |        | Hesperidin 0.5 % |              |        |
|------------------------------------------------------------|------------------|-------------|--------|------------------|--------------|--------|------------------|--------------|--------|
|                                                            | n <sup>1</sup>   | Min-Max     | Median | n <sup>1</sup>   | Min-Max      | Median | n <sup>1</sup>   | Min-Max      | Median |
| <b>No probing</b>                                          |                  |             |        |                  |              |        |                  |              |        |
| Total duration of np                                       | 17               | 670.8-13314 | 2359   | 15               | 461.1-16363  | 3548   | 14               | 167.7-10158  | 3910   |
| Number of np                                               | 17               | 12-100      | 27     | 15               | 8-68         | 35     | 14               | 4-65         | 31.5   |
| Mean duration of np                                        | 17               | 44.54-133.1 | 81.72  | 15               | 49.69-467.5  | 87.81  | 14               | 41.93-267.7  | 106.63 |
| <b>Probing</b>                                             |                  |             |        |                  |              |        |                  |              |        |
| Total probing time                                         | 17               | 15486-28129 | 26441  | 15               | 12437-28339  | 25252  | 14               | 18641-28632  | 24890  |
| Number of probes                                           | 17               | 12-100      | 27     | 15               | 8-68         | 35     | 14               | 4-65         | 31.5   |
| Number of short probes (C<3 minutes)                       | 17               | 3-74        | 14     | 15               | 0-50         | 21     | 14               | 1-51         | 12     |
| <b>Pathway phase</b>                                       |                  |             |        |                  |              |        |                  |              |        |
| Total duration of C                                        | 17               | 3144-21443  | 10945  | 15               | 5694-22804   | 13407  | 14               | 1186-23659   | 10923  |
| Number of C                                                | 17               | 13-100      | 33     | 15               | 10-71        | 39     | 14               | 4-70         | 33     |
| Mean duration of C                                         | 17               | 80.6-809    | 288.4  | 15               | 176.5-862    | 349.2  | 14               | 153.3-1508   | 355.2  |
| <b>Derailed stylet activities</b>                          |                  |             |        |                  |              |        |                  |              |        |
| Total duration of F                                        | 17               | 0-8719      | 1123.3 | 15               | 0-5029       | 0      | 14               | 0-803        | 0      |
| Number of F                                                | 17               | 0-3         | 1      | 15               | 0-2          | 0      | 14               | 0-1          | 0      |
| Mean duration of F <sup>2</sup>                            | 9                | 818.6-5649  | 2380   | 3                | 583.6-5029   | 1210   | 2                | 492.1-803    | 648    |
| <b>Xylem phase</b>                                         |                  |             |        |                  |              |        |                  |              |        |
| Total duration of G                                        | 17               | 0-3307      | 0      | 15               | 0-5832       | 1951.7 | 14               | 0-8310       | 0      |
| Number of G                                                | 17               | 0-3         | 0      | 15               | 0-2          | 1      | 14               | 0-2          | 0      |
| Mean duration of G <sup>2</sup>                            | 8                | 902.5-1774  | 1083   | 11               | 1121.1-5094  | 1967   | 6                | 796.5-4155   | 1946   |
| <b>Phloem phase: general</b>                               |                  |             |        |                  |              |        |                  |              |        |
| Total duration of phloem phase E (E1+E2)                   | 17               | 0-22551     | 11602  | 15               | 0-19408      | 4846   | 14               | 0-26932      | 7793   |
| Total duration of E1                                       | 17               | 0-302.8     | 68.2   | 15               | 0-1010.3     | 123.2  | 14               | 0-229.1      | 110.9  |
| Total duration of E2                                       | 17               | 0-22510     | 11417  | 15               | 0-19327      | 4723   | 14               | 0-26908      | 7627   |
| <b>Phloem phase: salivation (E1)</b>                       |                  |             |        |                  |              |        |                  |              |        |
| Number of E1                                               | 17               | 0-4         | 1      | 15               | 0-7          | 2      | 14               | 0-6          | 2.5    |
| Mean duration of E1 <sup>2</sup>                           | 16               | 35.05-100.9 | 45.83  | 14               | 31.75-144.3  | 54.4   | 13               | 21.45-76.4   | 46.56  |
| Number of single E1 <sup>2</sup>                           | 17               | 0-1         | 0      | 15               | 0-1          | 0      | 14               | 0-1          | 0      |
| Total duration of E1 followed by E2 <sup>2</sup>           | 16               | 35.05-302.8 | 74.04  | 14               | 49.98-1010.3 | 120.64 | 13               | 23.89-229.1  | 104.95 |
| Total duration of E1 followed by E2 >10 min <sup>2</sup>   | 15               | 35.05-147.2 | 54.41  | 12               | 49.98-188.7  | 96.01  | 13               | 23.89-163.5  | 62.05  |
| Duration of the E1 followed by 1st E2 <sup>2</sup>         | 16               | 25.48-150   | 46.62  | 14               | 24.04-90.1   | 53.06  | 13               | 23.89-66.9   | 45.87  |
| Duration of the E1 followed by 1st E2 >10 min <sup>2</sup> | 15               | 35.05-79.13 | 45.39  | 12               | 41.11-90.09  | 56.37  | 13               | 23.89-64.6   | 45.87  |
| Contribution of E1 to phloem phase (%) <sup>2</sup>        | 16               | 0.168-29.36 | 1.03   | 14               | 0.2802-36.81 | 2.086  | 13               | 0.0887-10.93 | 1.913  |
| <b>Phloem phase: sap ingestion (E2)</b>                    |                  |             |        |                  |              |        |                  |              |        |
| Number of E2                                               | 17               | 0-4         | 1      | 15               | 0-7          | 2      | 14               | 0-6          | 2      |
| Number of E2 >10 min                                       | 17               | 0-3         | 1      | 15               | 0-3          | 2      | 14               | 0-4          | 1      |
| Mean duration of E2 <sup>2</sup>                           | 16               | 242.9-22510 | 4272   | 14               | 187.1-17789  | 2524   | 13               | 419.4-26908  | 3281   |
| Duration of the longest E2 <sup>2</sup>                    | 16               | 513.5-22510 | 10191  | 14               | 351-18621    | 3938   | 13               | 601.2-26908  | 7622   |

<sup>1</sup> number of replications; <sup>2</sup> only the EPG recordings that included a particular waveform were included in calculations; np – no probing (aphid stylets outside the plant tissues); C – pathway activity (extracellular stylet penetration with potential drops, i.e., short cell punctures); F – derailed stylet activities (difficulties in penetration); G – xylem phase (ingestion of xylem sap); E – phloem phase including E1 (phloem salivation) and E2 (phloem sap ingestion); E2 > 10 min. – sustained ingestion of phloem sap.

**Table S6.** Probing behavior of *Myzus persicae* on *Brassica rapa* subsp. *pekinensis* treated with ethanolic solutions of hesperidin: sequential EPG parameters (min-max and median values).

| EPG variable                                                           | Hesperidin 0.0 % |             |        | Hesperidin 0.1 % |             |        | Hesperidin 0.5 % |              |        |
|------------------------------------------------------------------------|------------------|-------------|--------|------------------|-------------|--------|------------------|--------------|--------|
|                                                                        | n <sup>1</sup>   | Min-Max     | Median | n <sup>1</sup>   | Min-Max     | Median | n <sup>1</sup>   | Min-Max      | Median |
| <b>Start of EPG</b>                                                    |                  |             |        |                  |             |        |                  |              |        |
| Time to 1st probe from start of EPG                                    | 17               | 0.68-438.4  | 32.16  | 15               | 0.9-995.4   | 47.73  | 14               | 1.04-396.7   | 52.21  |
| Duration of 1st probe                                                  | 17               | 6.34-551.8  | 46.69  | 15               | 0.1-281.4   | 54.27  | 14               | 10.06-393.3  | 38.49  |
| Duration of the second nonprobe period                                 | 17               | 18.39-309.4 | 41.28  | 15               | 24.72-242.7 | 46.33  | 14               | 25.97-203.1  | 70.25  |
| Duration of 2nd probe                                                  | 17               | 11.5-17472  | 175.55 | 15               | 0-868       | 30.99  | 14               | 9.57-2071    | 79.1   |
| <b>Before 1<sup>st</sup> phloem phase</b>                              |                  |             |        |                  |             |        |                  |              |        |
| Time from start of EPG to 1st E <sup>2</sup>                           | 17               | 1473-28800  | 9438   | 15               | 1584-28800  | 8271   | 14               | 1659-28800   | 8547   |
| Time from 1st probe to 1st E <sup>3</sup>                              | 17               | 1473-28793  | 9408   | 15               | 1584-28736  | 8219   | 14               | 1635-28787   | 8349   |
| Time from the beginning of that probe to 1st E <sup>4</sup>            | 16               | 425.8-8958  | 1586   | 14               | 416.5-5472  | 1781   | 13               | 715.6-5659   | 1478   |
| Number of probes to the 1st E1                                         | 16               | 2-50        | 16.5   | 14               | 0-68        | 16.5   | 13               | 3-56         | 14     |
| Duration of nonprobe period before the 1st E                           | 17               | 335.5-13314 | 1530   | 15               | 111.1-6352  | 1106   | 14               | 167.7-8872   | 1847   |
| Duration of the shortest C wave before E1                              | 16               | 341.5-8958  | 1132   | 14               | 412.4-5127  | 1306   | 13               | 600-3593     | 1188   |
| <b>1<sup>st</sup> phloem phase</b>                                     |                  |             |        |                  |             |        |                  |              |        |
| Duration of 1 <sup>st</sup> phloem phase E                             | 16               | 56.89-22551 | 4162   | 14               | 31.68-17839 | 862    | 13               | 136.43-26932 | 2632   |
| <b>Before 1<sup>st</sup> sap ingestion phase E2</b>                    |                  |             |        |                  |             |        |                  |              |        |
| Time from start of EPG to 1st E <sup>5</sup>                           | 17               | 1508-28800  | 10558  | 15               | 1628-28800  | 11011  | 14               | 1701-28800   | 8601   |
| Time from 1st probe to 1st E <sup>6</sup>                              | 17               | 1508-28793  | 10526  | 15               | 1627-28736  | 11010  | 14               | 1677-28787   | 8403   |
| Time from the beginning of that probe to 1st E <sup>7</sup>            | 16               | 451.3-9002  | 1681   | 14               | 495-5513    | 1984   | 13               | 782.6-5705   | 1536   |
| <b>Before 1<sup>st</sup> sap ingestion phase E2&gt;10 min</b>          |                  |             |        |                  |             |        |                  |              |        |
| Time to from start of EPG 1st E2> 10 min <sup>8</sup>                  | 17               | 1508-28800  | 14644  | 15               | 1628-28800  | 16260  | 14               | 1701-28800   | 8601   |
| Time from 1st probe to 1st E2>10 min <sup>9</sup>                      | 17               | 1508-28793  | 14610  | 15               | 1627-28798  | 16212  | 14               | 1677-28787   | 8403   |
| Time from the beginning of that probe to 1st E2> 10 min. <sup>10</sup> | 15               | 773-9002    | 1762   | 12               | 785.7-6252  | 2888   | 13               | 815-5705     | 1536   |
| <b>After 1<sup>st</sup> phloem phase</b>                               |                  |             |        |                  |             |        |                  |              |        |
| Number of probes after 1st E                                           | 17               | 0-56        | 12     | 15               | 0-57        | 10     | 14               | 0-42         | 9.5    |
| Number of probes shorter than 3 minutes after 1st E                    | 17               | 0-48        | 4      | 15               | 0-42        | 5      | 14               | 0-37         | 4.5    |
| Potential E2 index                                                     | 17               | 0-100       | 55.67  | 12               | 0-100       | 37.88  | 13               | 0-100        | 44.65  |

<sup>1</sup> number of replications; <sup>2</sup> total duration of of EPG recording if E is missing; <sup>3</sup> time from 1<sup>st</sup> probe to the end of EPG recording if E is missing; <sup>4</sup> missing data if E is missing; E2; <sup>5</sup> total duration of of EPG recording if E is missing; <sup>6</sup> time from 1<sup>st</sup> probe to the end of EPG recording if E is missing; <sup>7</sup> missing data if E is missing; <sup>8</sup> total duration of of EPG recording if E is missing; <sup>9</sup> time from 1<sup>st</sup> probe to the end of EPG recording if E is missing; <sup>10</sup> missing data if E is missing.
